# Supplementary material for: Overexpressed ITGA2 contributes to paclitaxel resistance by ovarian cancer cells through the activation of the AKT/FoxO1 pathway
Source: publisher site journal article supplement (doi:10.18632/aging.102954), 2020-03-22
Supplement: Supplementary file [file aging-v12i6-102954-supplementary-material-SD1.pdf]

## SUPPLEMENTARY FIGURE

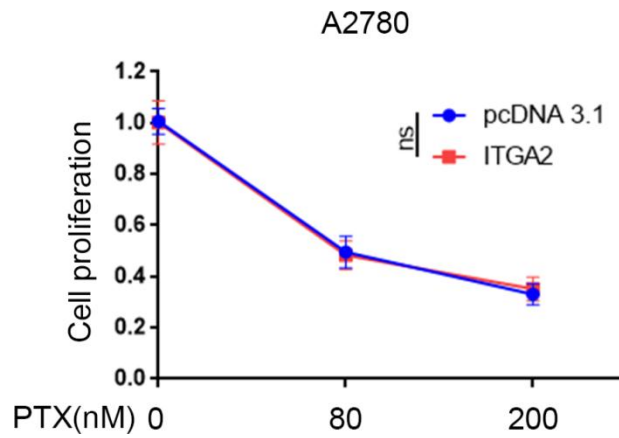

**Supplementary Figure 1. A2780 cells lines were infected pcDNA 3.1 or ITGA2.** 48 hours post-infection, the cells were harvested for MTS assay with the treatment of PTX. Each bar represents the mean  $\pm$  SD of five independent experiments. pcDNA 3.1 group was compared with ITGA2 group. Statistical analyses were performed with one-way ANOVA followed by Tukey's multiple comparison's tests. ns, not significant.
