# Supplementary material for: Overexpressed ITGA2 contributes to paclitaxel resistance by ovarian cancer cells through the activation of the AKT/FoxO1 pathway
Source: publisher site journal article supplement (doi:10.18632/aging.102954), 2020-03-22
Supplement: Supplementary file [file aging-v12i6-102954-supplementary-material-SD2.pdf]

## SUPPLEMENTARY TABLES

**Supplementary Table 1. Sequences of RT-qPCR primers.**

| <b>Species</b> | <b>Gene</b> | <b>Forward (5'-3')</b>  | <b>Reverse (5'-3')</b>  |
|----------------|-------------|-------------------------|-------------------------|
| Human          | GAPDH       | ACCCAGAAGACTGTGGATGG    | TTCAGCTCAGGGATGACCTT    |
| Human          | ITGA2       | GGGAATCAGTATTACACAACGGG | CCACAACATCTATGAGGGAAGGG |

**Supplementary Table 2. Sequences of gene-specific shRNAs and siRNAs.**

| <b>si-Control</b> | <b>purchased from RIBOBIO</b>                              |
|-------------------|------------------------------------------------------------|
| sh-ITGA2 #1       | CCGGCCGGCCAGATAGTGCTATATACTCGAGTATATAGCACTATCTGGCCGGTTTTTG |
| sh-ITGA2 #2       | CCGGATGGCAATATCACGGTTATTCCTCGAGGAATAACCGTGATATTGCCATTTTTTG |
